4. Baraka A, Choueiry P, Salem MR: The esophageal detector device in the morbidly obese (letter). *Anesth Analg* 77:400, 1993
  5. Wafai Y, Salem MR, Joseph NJ, Baraka A: The self-inflating bulb for confirmation of tracheal intubation: Incidence and demography of false negatives (abstract). *ANESTHESIOLOGY* 81:A1303, 1994
  6. Salem RM, Wafai Y, Joseph NJ, Baraka A, Czinn EA: Efficacy of the self-inflating bulb in detecting esophageal intubation: Does the presence of a nasogastric tube or cuff deflation make a difference? *ANESTHESIOLOGY* 80:42-48, 1994
  7. Wafai Y, Salem MR, Czinn EA, Barbella J, Baraka A: The self-inflating bulb in detecting esophageal intubation: Does the presence of a nasogastric tube or cuff deflation make a difference? *ANESTHESIOLOGY* 80:42-48, 1994
- Anesthesiology  
82:316, 1995  
© 1995 American Society of Anesthesiologists, Inc.  
J. B. Lippincott Company, Philadelphia

- inflating bulb in detecting esophageal intubation: Effect of bulb size and technique used (abstract). *ANESTHESIOLOGY* 79:A496, 1993
8. Nunn JF: The oesophageal detector device (letter). *Anaesthesia* 43:804, 1988
9. Williams KN, Nunn JF: The oesophageal detector device: A prospective trial in 100 patients. *Anaesthesia* 44:984-985, 1989
10. Wee MYK: The oesophageal detector device: Assessment of a method to distinguish oesophageal from tracheal intubation. *Anaesthesia* 43:27-29, 1988

(Accepted for publication October 5, 1994.)

## The History of Immediate Hypersensitivity Reactions

*To the Editor:*—An unreferenced article by Ovary on the history of immediate hypersensitivity reactions describing the first recorded death from anaphylaxis<sup>1</sup> is referenced in major anesthetic textbooks.<sup>2,3</sup> This event is said to be recorded in hieroglyphics on an Egyptian ebony plate from 2600 BC and to tell the story of "Menes, son of Sargon the Great, who came to Conquer Egypt but died following a bee sting."

Many tales from ancient Egypt become embellished over the years. The curse of Tutankhamen for example, was fictitious. This tale of anaphylaxis is no exception.

Menes is the name given to the first Egyptian pharaoh (the first king of the first dynasty). Although semilegendary, this figure was based on a native Egyptian who, modern chronologic studies would suggest, ruled about 3100 BC.

The ebony plate found at the entrance to his otherwise empty tomb appears to show a wasp or hornet and was translated by Waddell 1930<sup>4</sup> to suggest that Menes died from a wasp sting. This has been disputed by many eminent Egyptologists, however, and other interpretations are perhaps more likely.<sup>5</sup> The earliest "contemporary" account from a Greek historian states that Menes was killed by a hippopotamus!

As for the rest of the story, Sargon the Great, ruler of Akkad (in modern Iraq), lived in the 27th century BC. His son and successor was Narim-Sin. They were a warlike family, but there is no evidence that there was any contact with Egypt at this time, warlike or otherwise. 2600 BC is a period of demonstrable stability and prosperity in Egypt, and there was no evidence of war with anyone during this period. There were no foreign invasions of Egypt until the Syro-palestinian Hyksos rulers of the 17th century BC. (None of these had names like Menes or Sargon.)

The true fate of Menes may never be known. The consensus would seem to be that, in the absence of more factual data, the tale of Menes

dying from a bee sting must be considered a myth, and the remainder of the story as told by Ovary is, at best, inaccurate.

**Simon M. Whiteley, M.B.**  
Senior Registrar, Anaesthesia  
The General Infirmary at Leeds  
Great George Street  
Leeds LS1 3EX, United Kingdom

The author thanks Dr. Edna R. Russman, Egyptologist and Assistant Curator, Kelsey Museum of Archaeology, University of Michigan, for help and advice.

## References

1. Ovary Z: The history of immediate hypersensitivity. *Hospital Practice* 24:169-173, 177-179, 1989
2. Weiss ME, Hirshman CA: Anaphylactic reactions and anesthesia, *Principles and Practice of Anesthesiology*. Edited by Rogers MC, Tinker JH, Covino BG, Longnecker DE. St. Louis, Mosby, 1993, pp 2457-2481
3. Weiss ME, Levy JH: Immunological complications, *Anesthesia and Perioperative Complications*. Edited by Benumof JL, Saidman IJ. St. Louis, Mosby, 1992, pp 378-395
4. Waddell LS: Egyptian Civilization: Its Summerian Origin and Real Chronology and Summerian Origin of Egyptian Hieroglyphics. London, Luzac and Company Ltd, 1930
5. Cohen SG: The pharaoh and the wasp. *Allergy Proc* 10:149-151, 1989

(Accepted for publication October 5, 1994.)
